# Supplementary material for: The histone demethylase Kdm6b regulates subtype diversification of mouse spinal motor neurons during development
Source: PubMed Central journal article supplement (PMC8854633; doi:10.1038/s41467-022-28636-7), 2022-02-17
Supplement: 41467_2022_28636_MOESM1_ESM.pdf [file 41467_2022_28636_MOESM1_ESM.pdf]

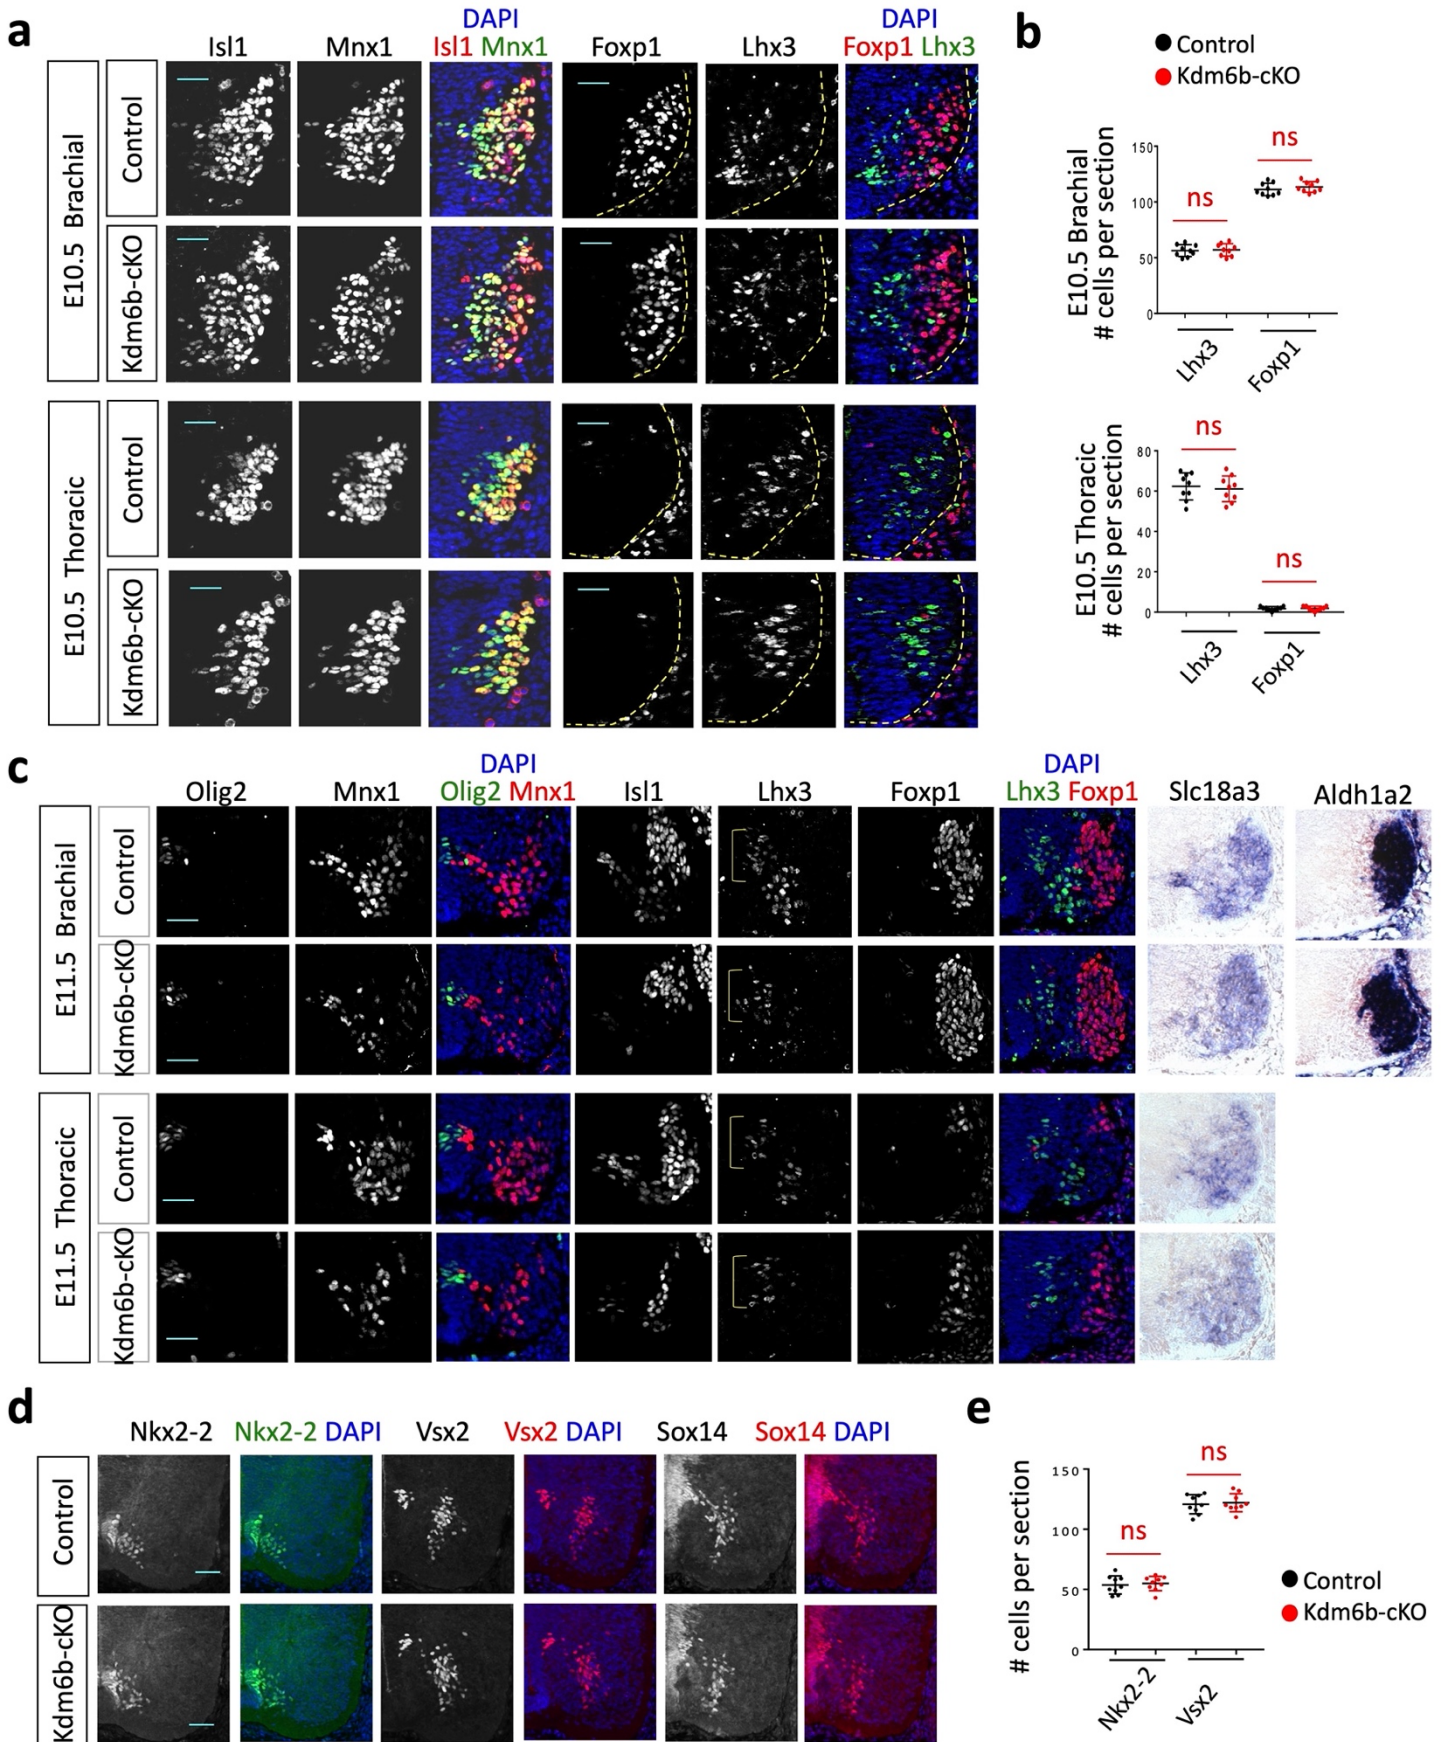

**Supplementary Figure 1.** *Kdm6b* was dispensable for early MN fate specification, but it was required for MN columnar diversification. (a) Immunohistochemical analyses with *Isl1*, *Mnx1*, *Lhx3*, and *Foxp1* antibodies in E10.5 spinal cords at brachial and thoracic levels. *Isl1*<sup>+</sup>*Mnx1*<sup>+</sup> MNs were comparable between control and *Kdm6b*-cKO at E10.5. Scale bars, 50 μm. (b) Quantification of the number of MNs expressing *Lhx3* or *Foxp1* per 12 μm thick section of the spinal cord at E10.5.

Neither Lhx3<sup>+</sup> nor Foxp1<sup>+</sup> MNs significantly changed in E10.5 *Kdm6b*-cKO spinal cords. The error bars represent the standard deviation of the mean. ns, non-significant in the two-tailed Student's t-test. n = 3-6 mice per genotype and 9 slices per genotype. (c) Immunohistochemical analyses with Olig2, Mnx1, Isl1, Lhx3, and Foxp1 antibodies and in situ hybridization analyses for Aldh1a2 and Slc18a3 in E11.5 spinal cords at brachial and thoracic levels. In E11.5 *Kdm6b*-cKO mice, the MNs expressing Mnx1, Isl1, or Lhx3 decreased, whereas the MNs expressing Foxp1 or Aldh1a1 increased. The brackets indicate Lhx3<sup>+</sup> V2 interneurons. Scale bars, 50 μm. (d,e) Immunohistochemical analyses with antibodies against p3 progenitor and V3 interneuron marker Nkx2-2 and V2a interneuron markers Vsx2 and Sox14 in E12.5 spinal cords. Scale bars, 50 μm. (e) Quantification of the number of Nkx2-2<sup>+</sup> (p3 progenitors and V3 interneurons) or Vsx2<sup>+</sup> (V2a interneurons) cells per 12 μm thick section. Nkx2-2<sup>+</sup> and Vsx2<sup>+</sup> cells were comparable between control and *Kdm6b*-cKO mice. The error bars represent the standard deviation of the mean. ns, non-significant in the two-tailed Student's t-test. n = 3-6 mice per genotype and 9 slices per genotype. (a-e) 3-6 embryos for each genotype and stage were analyzed and the representative images were shown. Source data for quantification are provided as a Source Data file.

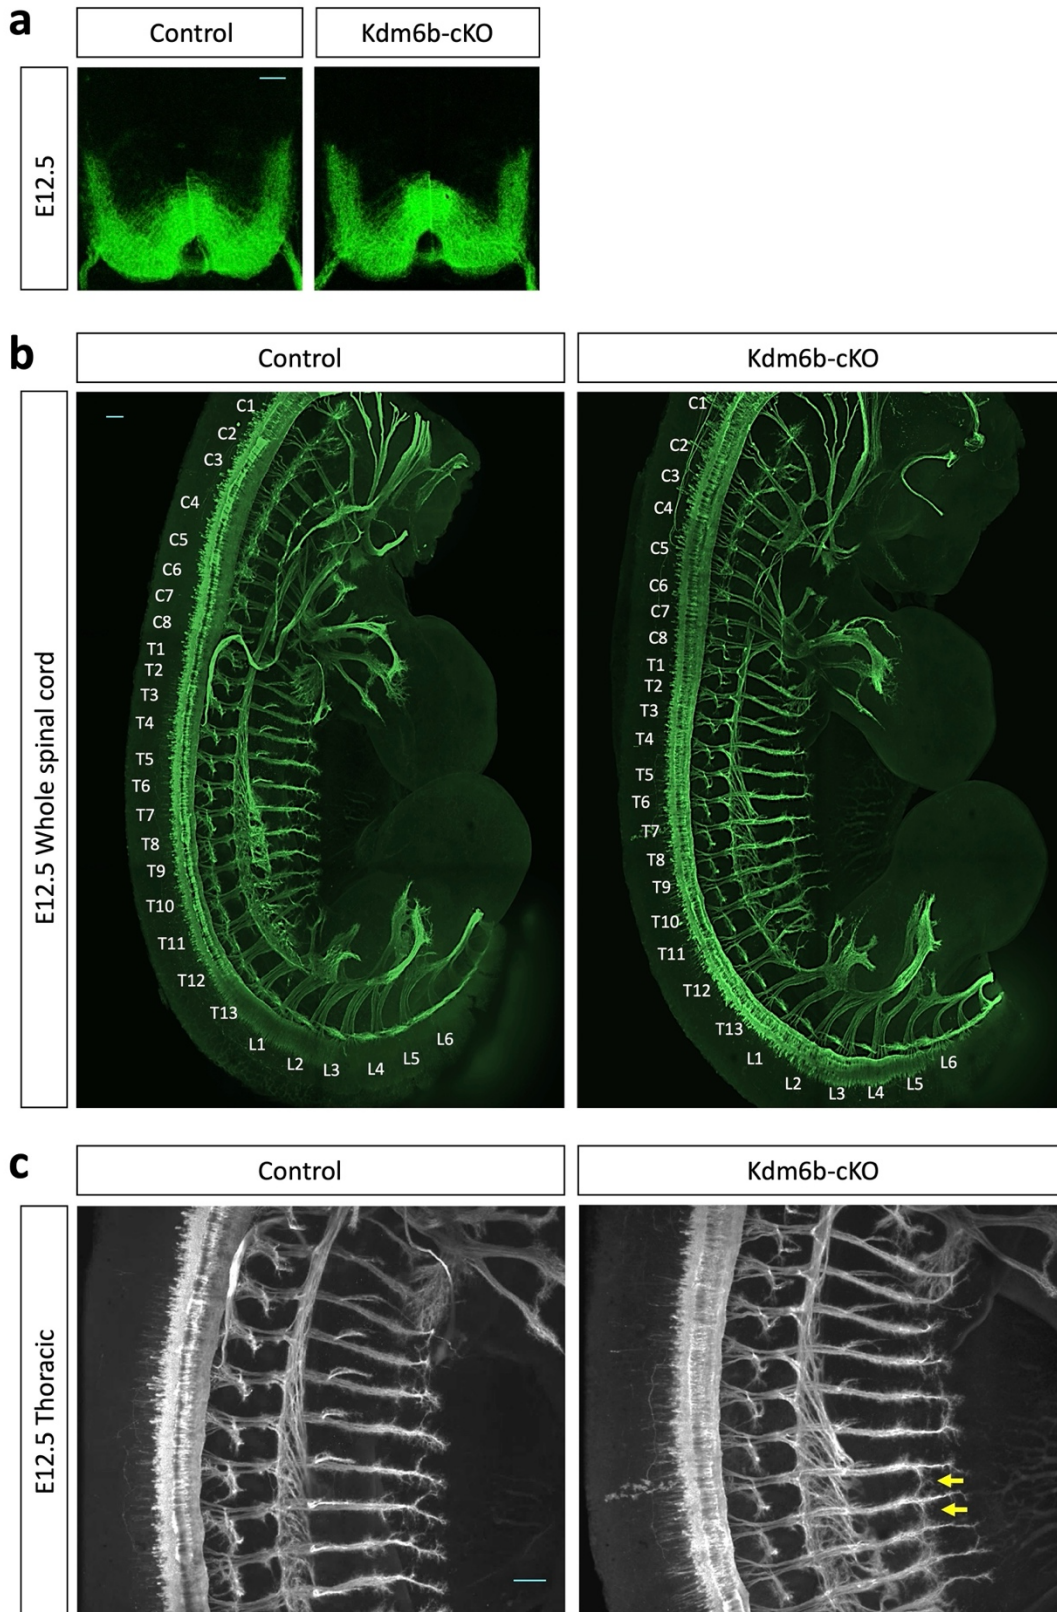

**Supplementary Figure 2.** Analysis of GFP<sup>+</sup> motor axonal projection pattern. **(a)** Transverse sections of E12.5 control (*Kdm6b*<sup>f/+</sup>; *Olig2-Cre*; *mTmG*) and *Kdm6b*-cKO (*Kdm6b*<sup>ff</sup>; *Olig2-Cre*; *mTmG*) mice. mGFP is expressed specifically in *Olig2-Cre* lineage cells, including MNs, within the spinal cord. In the periphery, only motor axons leaving the spinal cord expressed mGFP. Scale bars, 100  $\mu$ m. **(b,c)** The lateral view of E12.5 embryos to analyze GFP<sup>+</sup> motor axonal trajectory in the periphery. Scale bars, 100  $\mu$ m. **(c)** The enlarged view of E12.5 embryos to analyze GFP<sup>+</sup> motor axonal trajectory at thoracic levels. In *Kdm6b*-cKO mice, HMC-derived GFP<sup>+</sup> motor axons began to form abnormal bridge-like connections between intercostal nerves bundles (yellow arrows). Scale bars, 100  $\mu$ m. **(a-c)** 3-5 embryos per genotype in each condition were analyzed and the representative images were shown.

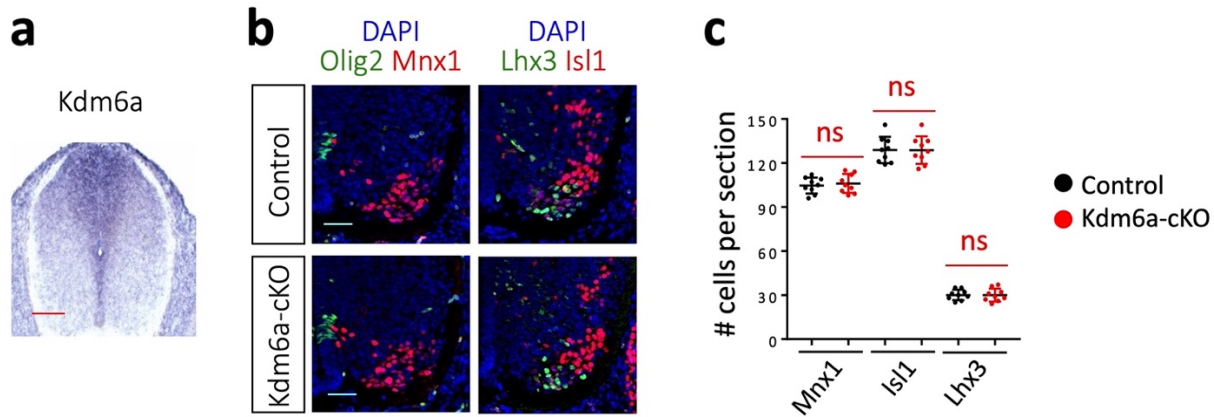

**Supplementary Figure 3.** Kdm6a was not needed for MN differentiation and MN columnar diversification. **(a)** The expression pattern of Kdm6a in E12.5 spinal cord, as detected by in situ hybridization analyses. Scale bars, 100  $\mu$ m. **(b)** Immunohistochemical analyses with Olig2, Mnx1, Isl1, and Lhx3 antibodies in E12.5 control and *Kdm6a*-cKO embryo spinal cords at thoracic levels. Scale bars, 50  $\mu$ m. **(c)** Quantification of the number of MNs expressing Mnx1, Isl1 or Lhx3 per 12  $\mu$ m thick section of the thoracic level spinal cord at E12.5. The error bars represent the standard deviation of the mean. ns, non-significant in the two-tailed Student's t-test. n = 3-6 mice per genotype and 9 slices per genotype.

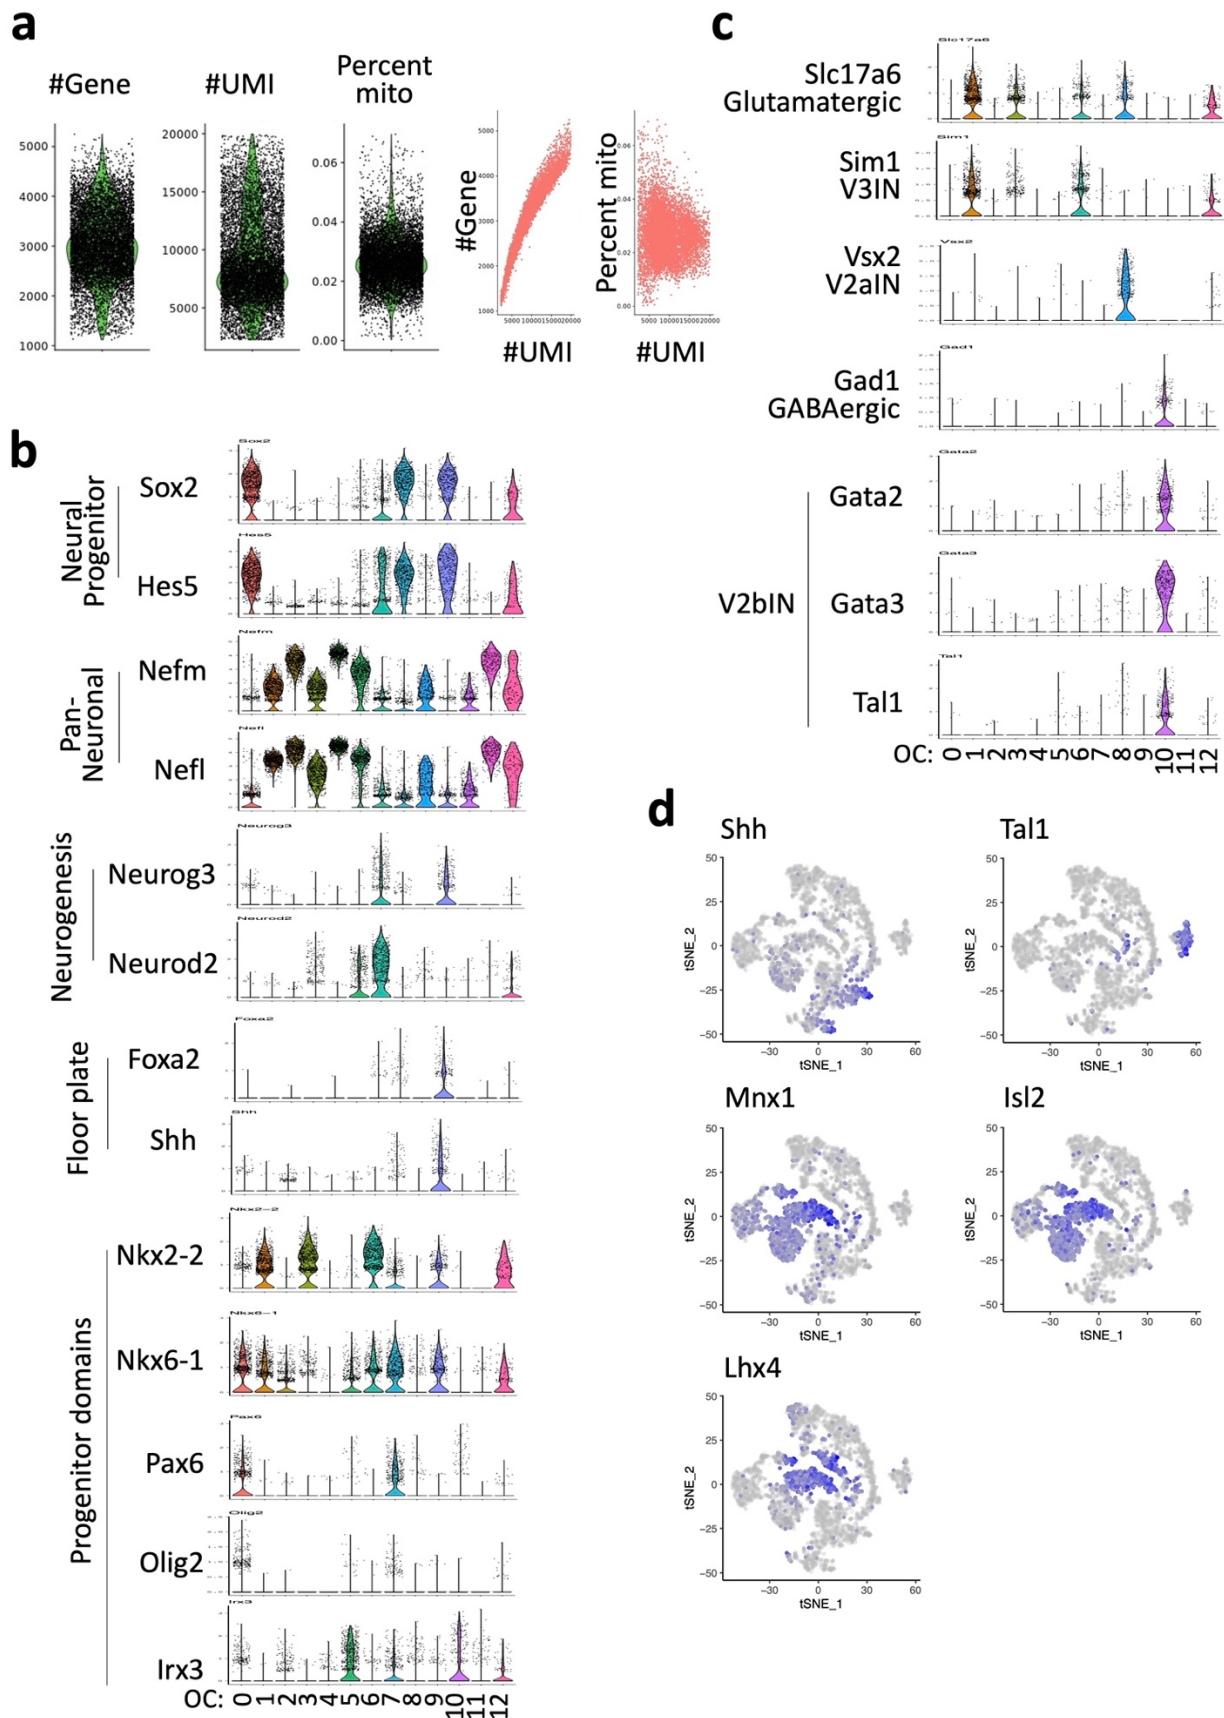

**Supplementary Figure 4.** Single-cell transcriptome analyses of *Olig2-Cre* lineage cells in E12.5 spinal cord. (a) Distribution of the number of genes, total number of Unique Molecular Identifier (UMI), and percentages of mitochondrial genes (Percent mito) within a cell for GFP<sup>+</sup> control cell population that passed quality control. (b,c) Violin plots for selected marker genes in OC0-OC12. (d) tSNE plots to show the expression of selected marker genes. The expression levels of the genes were indicated by blue color intensi

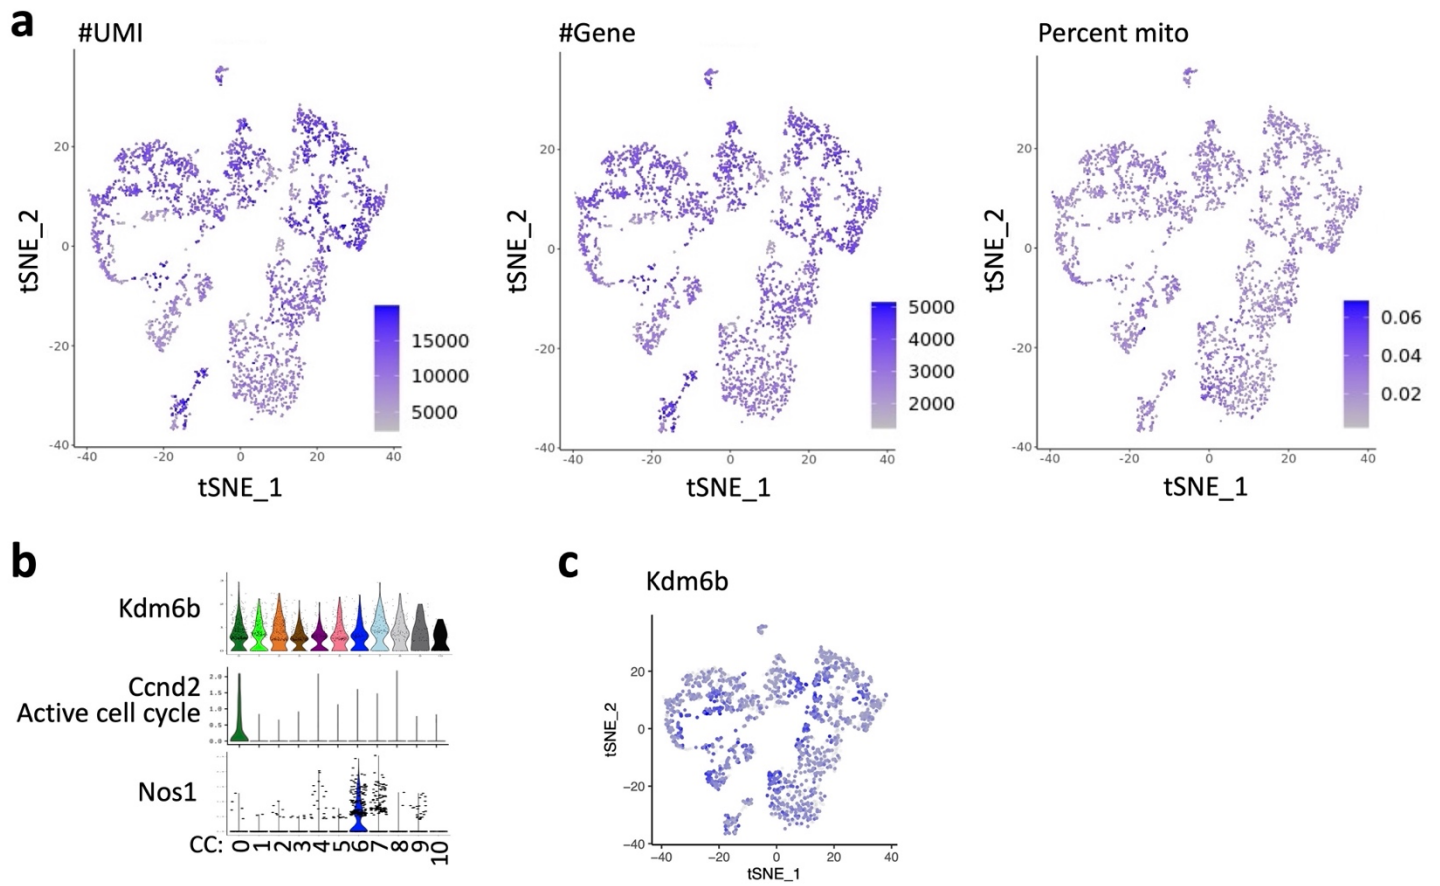

**Supplementary Figure 5.** Single-cell transcriptome analyses of *Slc18a3*<sup>+</sup> MN lineage cells. **(a)** Visualization of quality control for *Slc18a3*<sup>+</sup> control cell population to check for the presence of biases across the low-dimensional feature space according to the total number of UMI, number of genes, and percentages of mitochondrial genes within a cell. **(b)** Violin plots for selected marker genes in CC0-CC10. **(c)** tSNE plot to show *Kdm6b* expression. *Kdm6b* is broadly expressed in *Slc18a3*<sup>+</sup> cells, as indicated by blue color intensity.

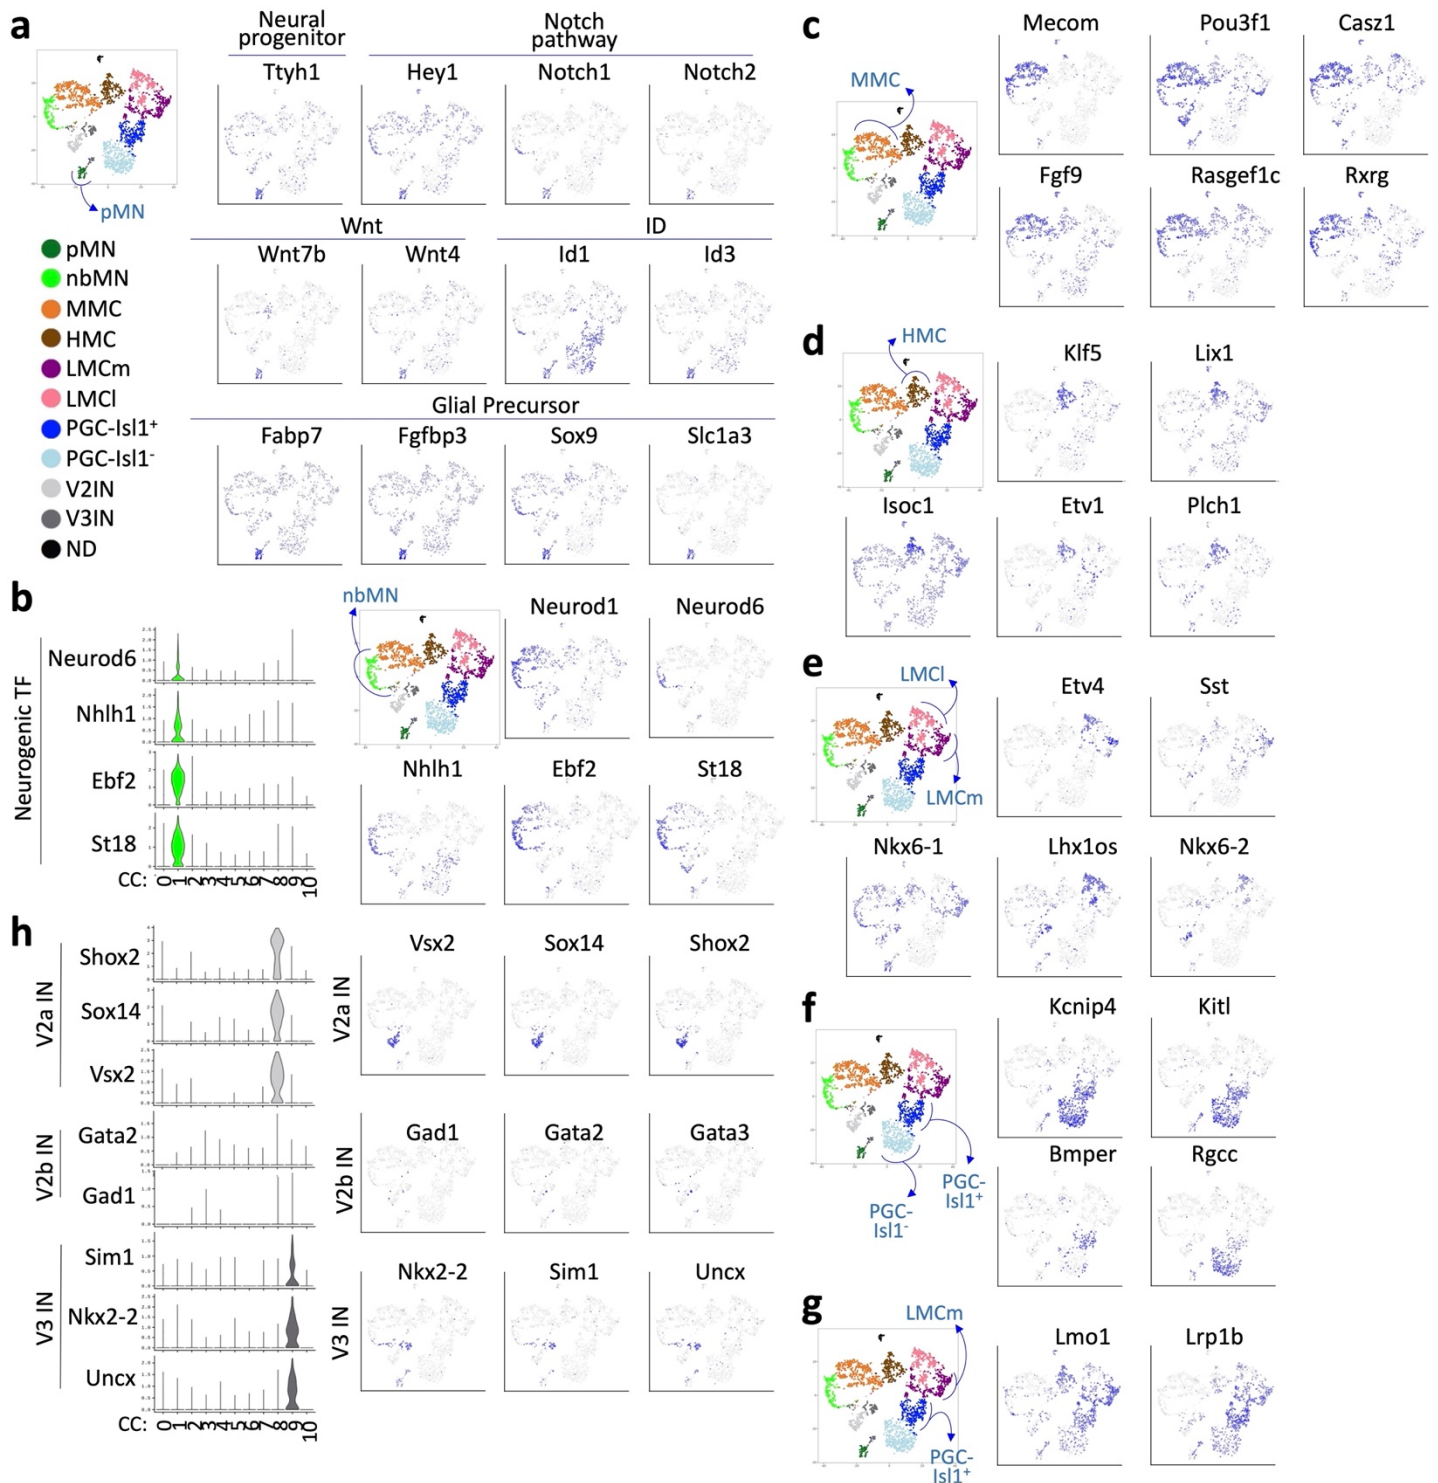

**Supplementary Figure 6.** Violin and tSNE plots to show the expression level and pattern of selected marker genes in control clusters CC0-CC10. Each dot represents a single cell. The expression levels of the genes in each dot were indicated by blue color intensity. The genes were selected from the marker list for pMN (**a**), nbMN (**b**), MMC (**c**), HMC (**d**), LMCI (**e**), PGC (**f**), LMCm and PGC-Is1<sup>+</sup> (**g**), and V2IN and V3IN (**h**) clusters.

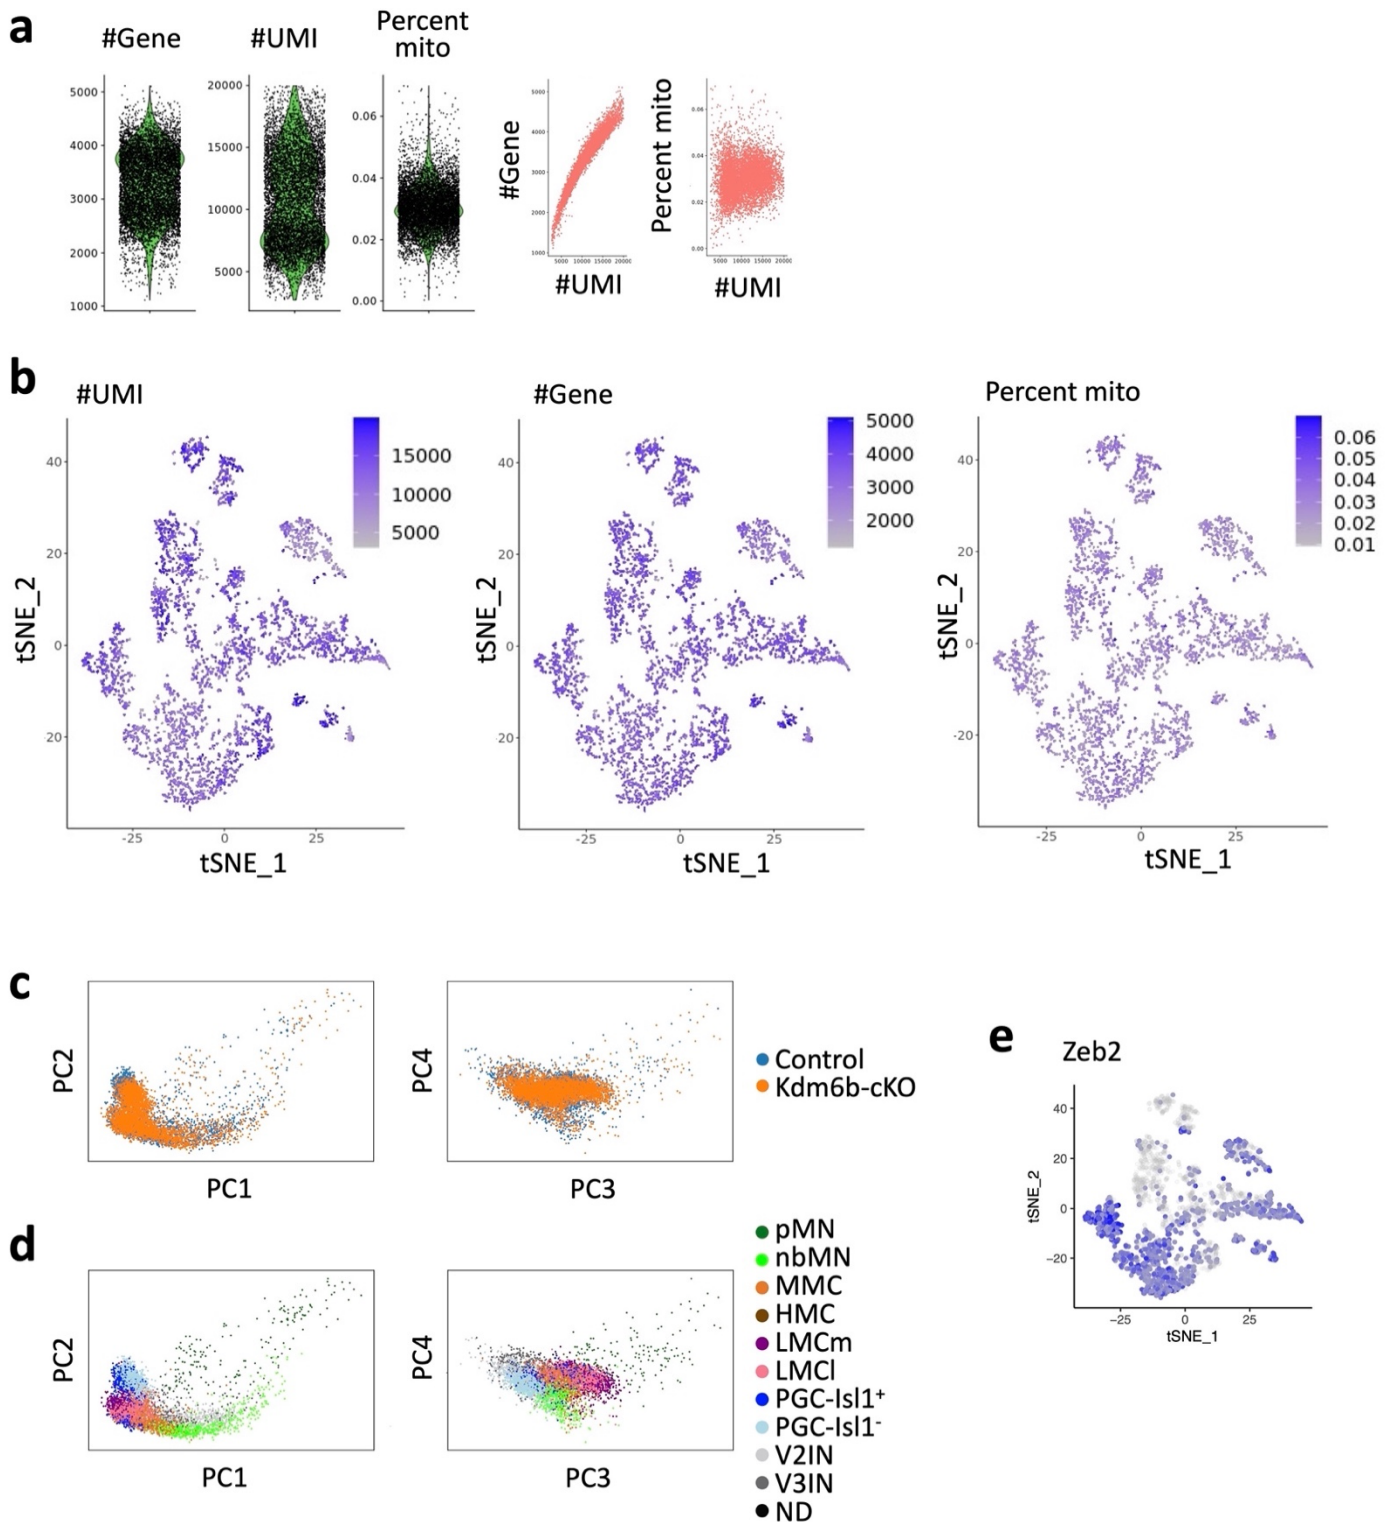

**Supplementary Figure 7.** Single-cell transcriptome analyses of *Kdm6b*-deficient MN lineage cells. **(a)** Distribution of the number of genes, total number of UMI, and percentages of mitochondrial genes within a cell for GFP<sup>+</sup> *Kdm6b*-cKO cell population that passed quality control. **(b)** Visualization of quality control for *Slc18a3*<sup>+</sup> *Kdm6b*-cKO population to check for the presence of biases across the low-dimensional feature space according to the total number of UMI, number of genes, and percentages of mitochondrial genes within a cell. **(c,d)** Projection of *Slc18a3*<sup>+</sup> population of cells for both control and *Kdm6b*-cKO into the same PCA subspace (left panel, PC1-2; right panel, PC3-4) before Seurat (CCA) integration to check for the presence of batch effects. Each cell is color-coded by its conditions (c) and by cell types (d) as defined in Fig. 7a. There are few batch effects between control and *Kdm6b*-cKO samples. **(e)** tSNE plots show the expression level of *Zeb2*, as indicated by blue color intensity.



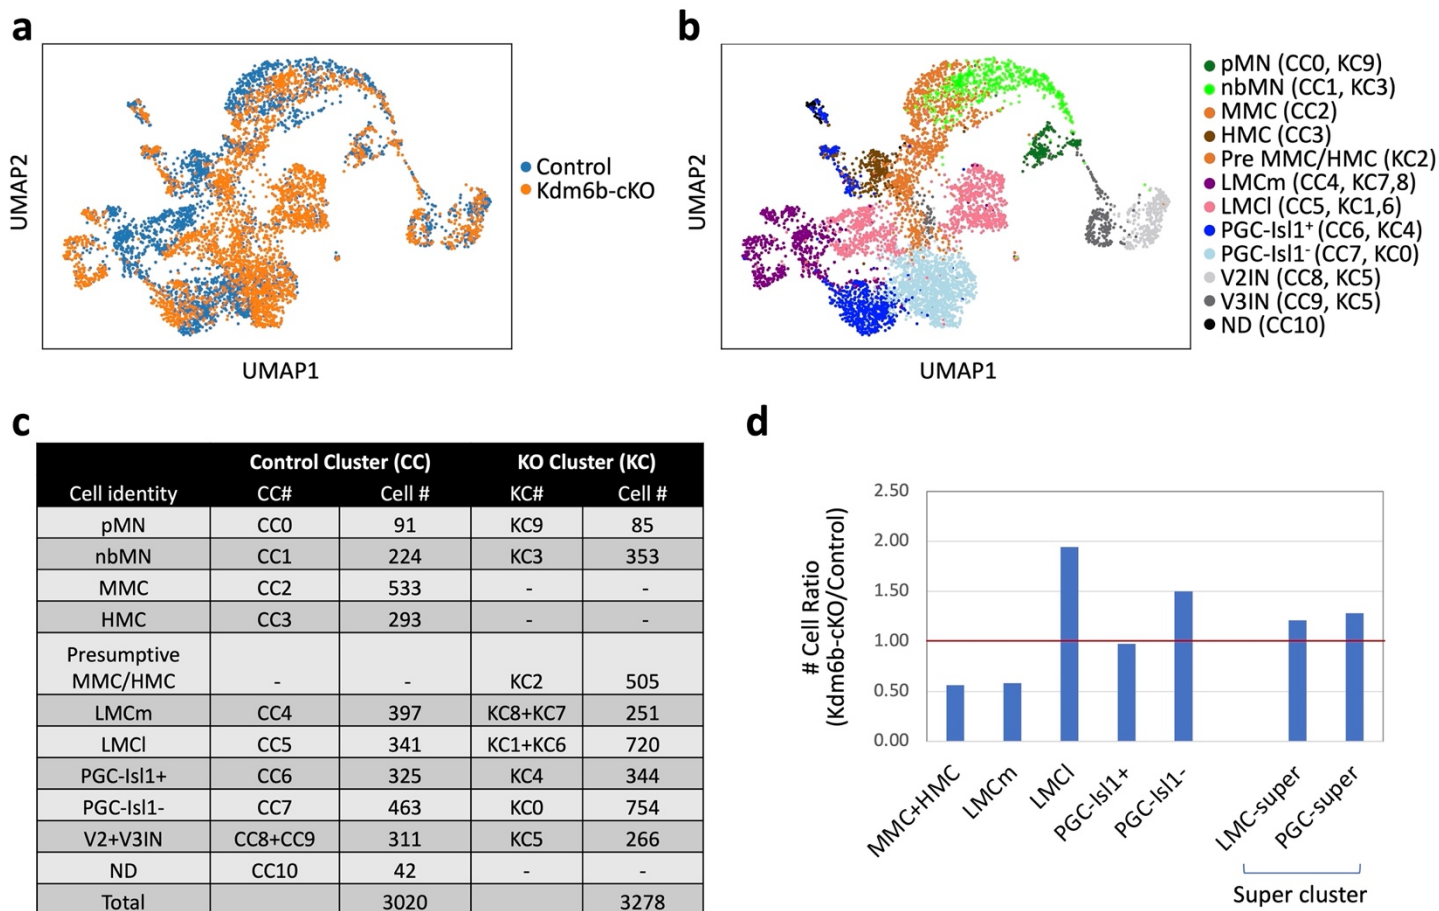

**Supplementary Figure 8.** (a-c) Projection of *Slc18a3*<sup>+</sup> population of cells for both control and *Kdm6b*-cKO, without Seurat canonical correlation analysis (CCA) integration, into the same UMAP feature space. Control and *Kdm6b*-cKO cells in pMN, nbMN, V2IN, and V3IN clusters are relatively well intermingled, whereas MN subtype cells tend to show more segregated patterns between control and *Kdm6b*-cKO cells. Each cell is color-coded by its genotype (a) and cell types as defined in Fig. 4a (CC, control cluster) and 7a (KC, KO cluster). As there are no clear MMC and HMC clusters in the *Kdm6b*-cKO sample, the presumptive MMC/HMC cluster (pre MMC/HMC) was plotted using the MMC color code for the *Kdm6b*-cKO sample. (c) The merged table for Figure 4b and 6b. (d) The ratio of *Kdm6b*-cKO cells over control cells in each cell type cluster or “super-cluster” marked as LMC-super (LMCI and LMCm) or PGC-super (PGC-Is11<sup>+</sup> and PGC-Is11<sup>-</sup>).

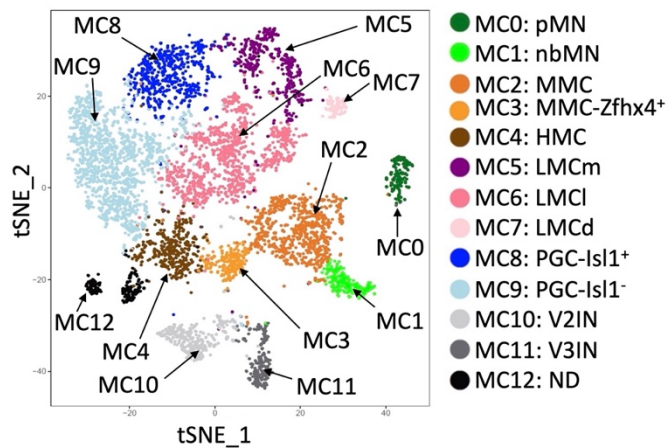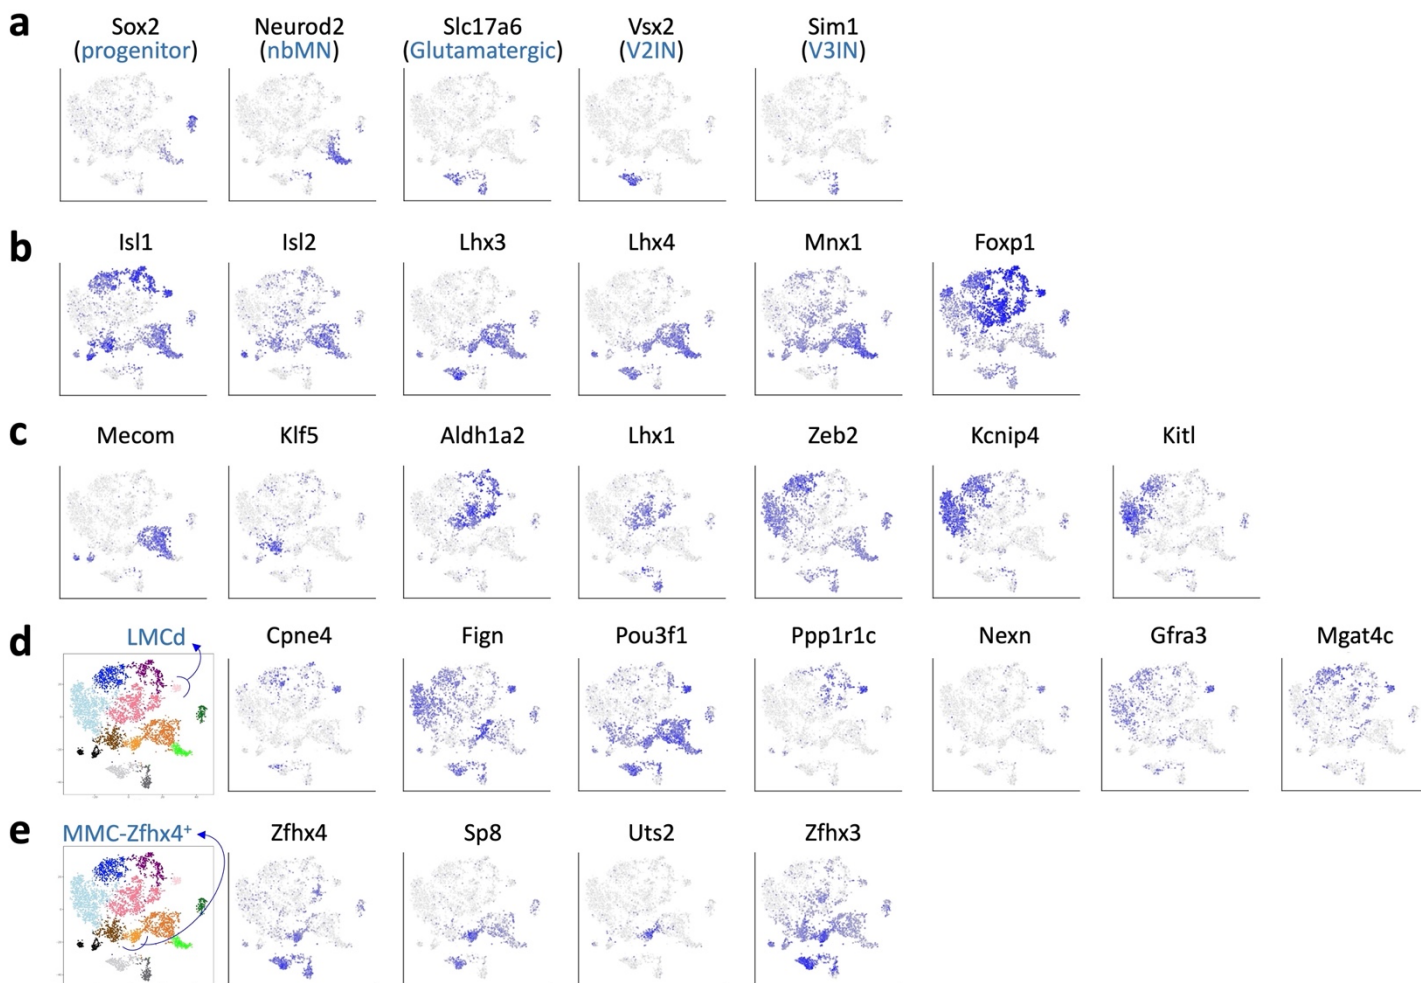

**Supplementary Figure 9.** tSNE plots show the expression level and pattern of selected marker genes in merged clusters MC0-MC12. Each dot represents a single cell. The expression levels of the genes in each dot were indicated by blue color intensity. The genes were selected for the genes enriched in immature cell type clusters (a), MN fate-specifying TFs (b), MN subtype marker genes (c), LMCd marker genes (d), and MMC-Zfhx4<sup>+</sup> marker genes (e).

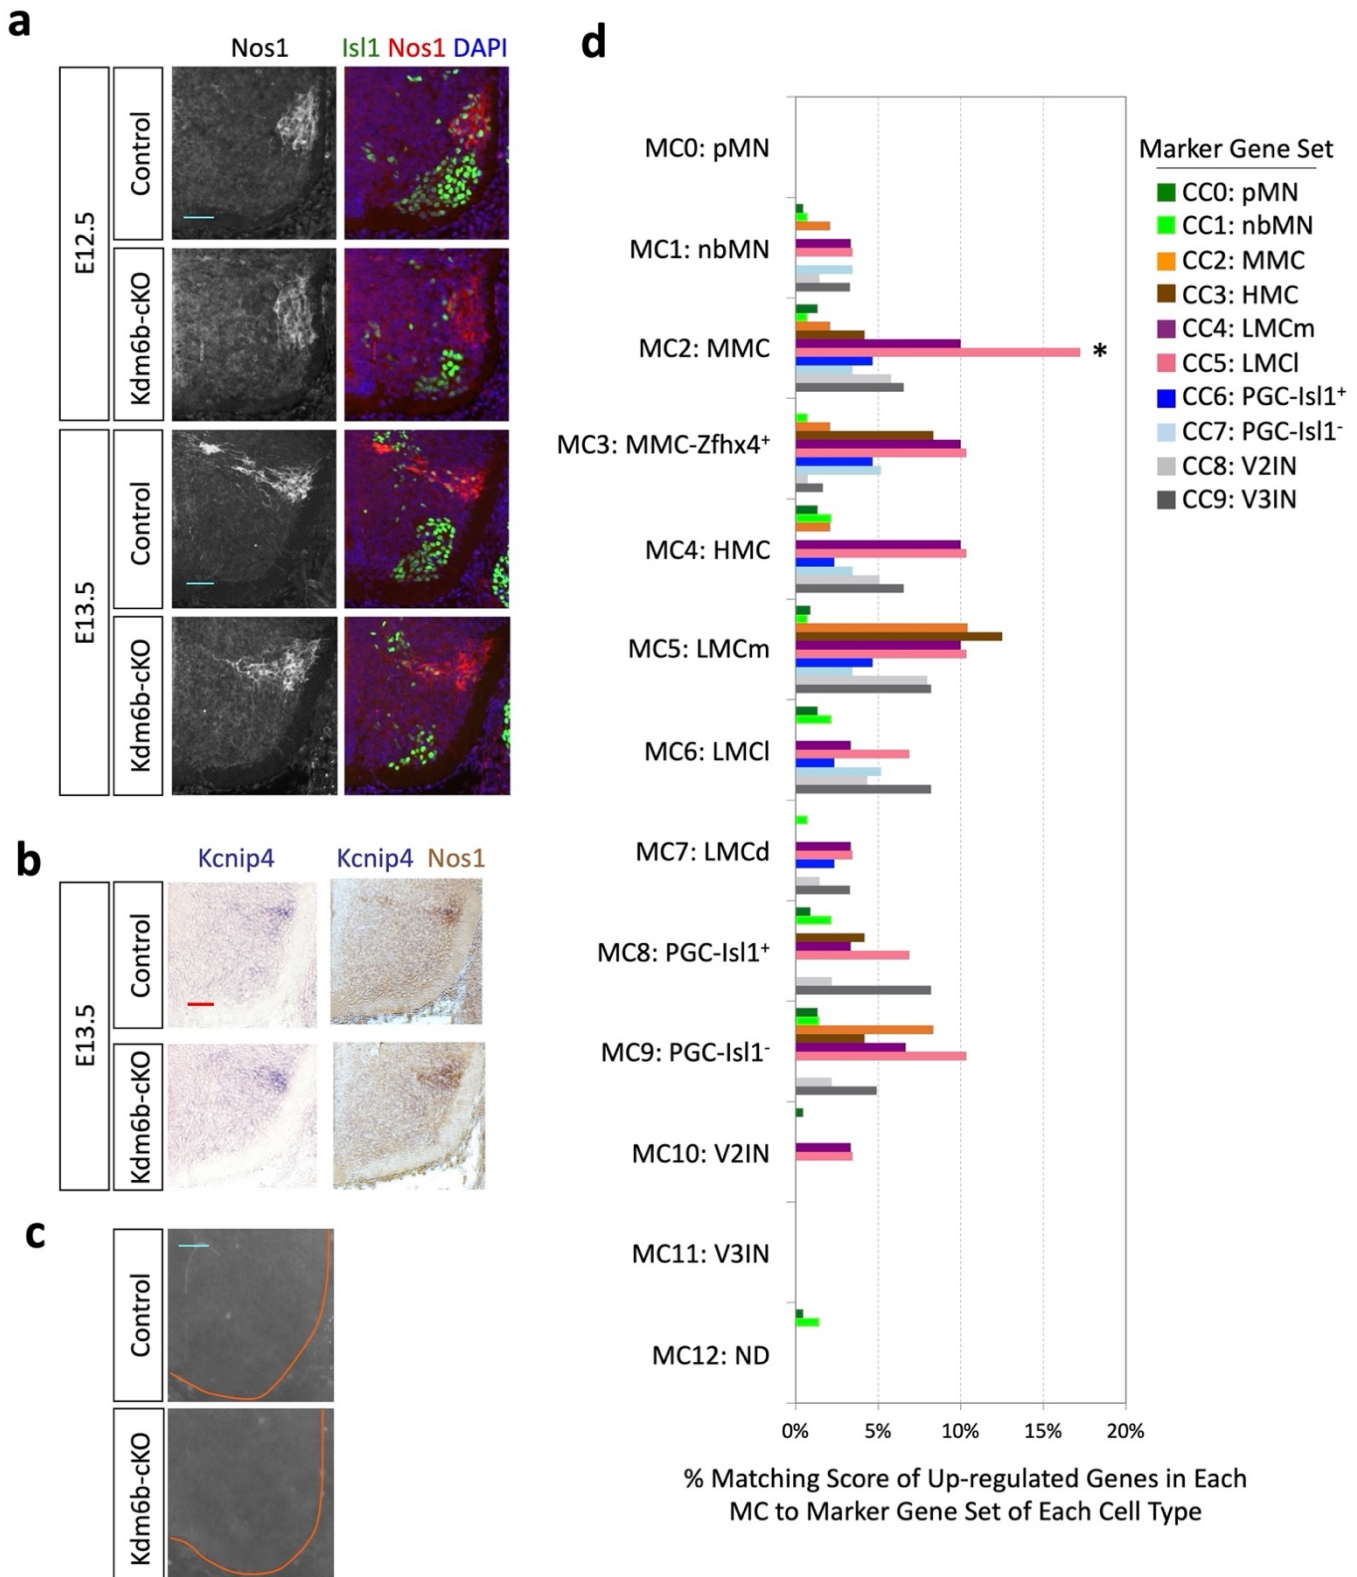

**Supplementary Figure 10.** *Kdm6b* regulates MN columnar diversification. **(a,b)** Immunohistochemical analyses with *Isl1* and *Nos1* antibodies (a) and in situ hybridization analyses for *Kcnip4* and *Nos1* (b) in thoracic spinal cords of *Kdm6b*-cKO and control mice. *Kcnip4*<sup>+</sup>*Nos1*<sup>+</sup> PGC MN area was expanded, but *Isl1*/*Nos1* double-positive cells reduced in *Kdm6b*-cKO relative to control mice. Scale bars, 50  $\mu$ m. **(c)** TUNEL assays revealed no significant change in apoptosis in E12.5 *Kdm6b*-cKO MNs. Scale bars, 50  $\mu$ m. **(a-c)** 3-6 embryos per genotype in each condition were analyzed and the representative images were shown. **(d)** Pairwise comparison of the genes significantly up-regulated in each MC to the marker gene sets in the control datasets CC0-CC9 in Fig. 5a. Matching scores show the percentage of each MC's up-regulated genes among the marker gene sets in CC0-CC9. The up-regulated genes in *Kdm6b*-deficient MMC and the LMCI marker set showed the highest matching score of 17% (marked by an asterisk).

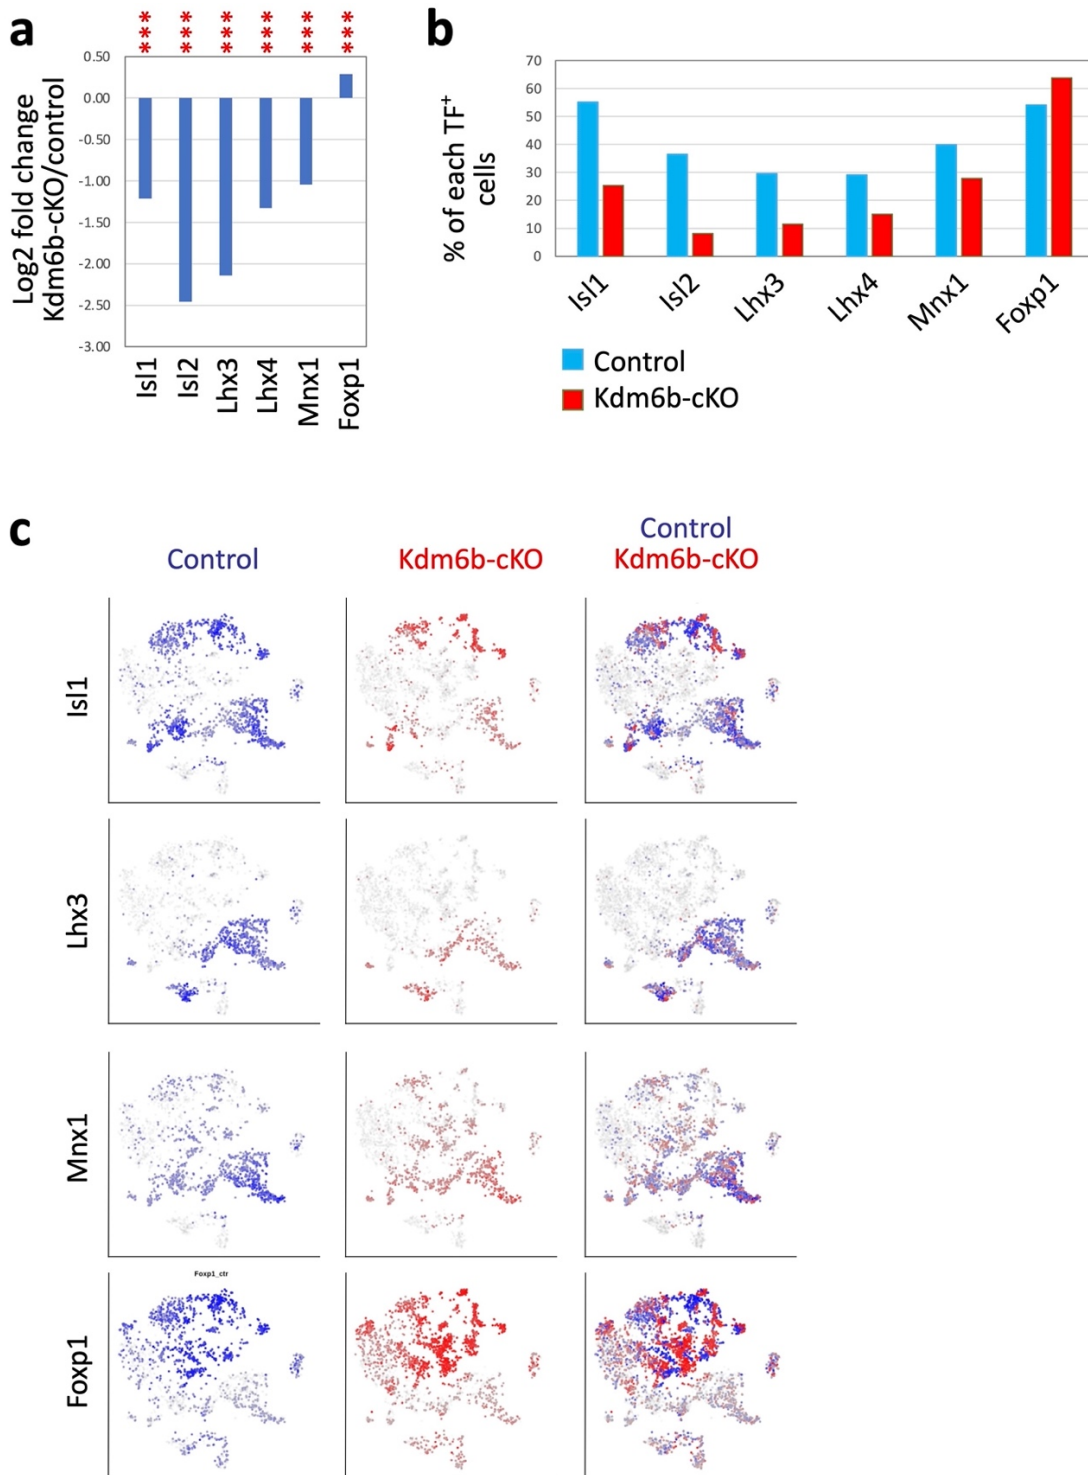

**Supplementary Figure 11.** *Isl1/2*, *Lhx3/4*, and *Mnx1* genes show a remarkable down-regulation, whereas *Foxp1* exhibits a significant up-regulation in *Kdm6b*-deficient MN lineage. **(a)** Relative gene expression levels of MN fate-specifying TFs in all *Slc18a3*<sup>+</sup> cells in *Kdm6b*-cKO compared to the control sample. \*\*\*,  $p_{adj} < 0.001$ . The  $p$ -value was calculated using the *WilcoxDETest* function in the Seurat package, in which a two-sided alternative hypothesis testing is performed. Multiple testing correction was carried out using the  $p_{adjust}$  function with  $-fdr$  option in the R package. The exact  $p$ -values are as follows. *Isl1*,  $1.4 \times 10^{-127}$ ; *Isl2*,  $6.72 \times 10^{-167}$ ; *Lhx3*,  $2.21 \times 10^{-79}$ ; *Lhx4*,  $4.55 \times 10^{-46}$ ; *Mnx1*,  $1.11 \times 10^{-31}$ ; *Foxp1*,  $4.58 \times 10^{-13}$ . **(b)** The percentage of each TF-expressing cells among all analyzed *Slc18a3*<sup>+</sup> cells in *Kdm6b*-cKO and control samples. **(c)** tSNE plots visualize the expression level and pattern of *Isl1*, *Lhx3*, *Mnx1*, and *Foxp1* in merged datasets. Each dot represents a single cell. The expression levels of the genes in each dot were indicated by blue (in control cells) or red (in *Kdm6b*-cKO) color intensity. The first and second columns show the location of each marker-expressing cells from the control (blue) or *Kdm6b*-cKO (red) sample in separate tSNE plots for each genotype. The third column shows the location of each marker-expressing cells from both control (blue) and *Kdm6b*-cKO (red) samples in the same tSNE plot.
